# Supplementary material for: A Glutathione-Nrf2-Thioredoxin Cross-Talk Ensures Keratinocyte Survival and Efficient Wound Repair
Source: PubMed Central journal article supplement (PMC4726503; doi:10.1371/journal.pgen.1005800), 2016-01-25
Supplement: pgen.1005800.s008.pdf [file pgen.1005800.s008.pdf]

**Table S1: Primers used for qRT-PCR**

| <i>Gene</i>     | <i>forward (5')</i>       | <i>reverse (3')</i>       |
|-----------------|---------------------------|---------------------------|
| <i>mAldh3a1</i> | GCTGGAGAGGACTGTGTAGA      | GGTCGAGTCTTGCCTGAGTT      |
| <i>mCat</i>     | AGTGTGCCATCTCGTCAGTG      | CCAGATGAAGCAGTGAAGG       |
| <i>mCbr1</i>    | TACCCGAGATGTCTGCAAGG      | CCTCTGTGATGGTCTCGCTT      |
| <i>mCbr3</i>    | TCGACATTCAAGCTGAGGTGA     | CCTGCAGACTGCTGATGTTCA     |
| <i>mElov11</i>  | CAAGGGCAGACAATCCATAG      | CCTCCATGTCTTCCACCACT      |
| <i>mElov13</i>  | ATCCGTGTAGATGGCAAAGC      | CCTTTTTGGAGGAGTACTGGG     |
| <i>mElov14</i>  | CAGCCACACGAACAGGAGAT      | GTTCTATCGCTGGACCTGGA      |
| <i>mElov16</i>  | GGTACCAGTGCAGGAAGATCA     | ACAATGGACCTGTCAGCAAA      |
| <i>mElov17</i>  | GGCATGATCGTATGATGGAA      | GCACACCTGCTGGCTTTATT      |
| <i>mFlg</i>     | GTCTTCTTCCAACAAGGTGCAT    | TTGCCAGCTTTAGCACCAGT      |
| <i>mGclc</i>    | AACAAGAAACATCCGGCATC      | CGTAGCCTCGGTAAAATG GA     |
| <i>mGsta3</i>   | TACTTTGATGGCAGGGGAAG      | GCACTTGCTGGAACATCAGA      |
| <i>mGulo</i>    | CCTTTTTGGAGGAGTACTGGG     | GCAGCTTGCTTCTGCTTCTAC     |
| <i>mIlf6</i>    | TTCTGCAAGTGCATCATCGT      | CCGGAGAGGAGACTTCACAG      |
| <i>mLor</i>     | CACTCATCTTCCCTGGTGCT      | TCCACCAGAGGTCTTTCCAC      |
| <i>mNqo1</i>    | CTGGCCCATTCAGAGAAGAC      | GTCTGCAGCTTCCAGCTTCT      |
| <i>mNrf2</i>    | TCCATTCCCGAATTACAGTGTCTTA | CGCCAAAATCTGTGTTTAAGGTG   |
| <i>mp21</i>     | GTGATTGCGATGCGCTCATG      | TCTCTTGCAGAAGACCAATC      |
| <i>mPtgs2</i>   | TCATACATTCCCCACGGTTT      | GATGCTCTTCCGAGCTGTG       |
| <i>mRps29</i>   | GGTCACCAGCAGCTCTACTG      | GTCCAACCTAATGAAGCCTATGTCC |
| <i>mS100A8</i>  | GTGAGATGCCACACCCACTTT     | GCCGTCTGAACTGGAGAAG       |
| <i>mSlc1a4</i>  | ACGGGGATCTTCTCTTTGGT      | CAGAAACCTGTTCCCTTCCA      |
| <i>mSlc7a11</i> | CAACAAAGATCGGGACTGCT      | GCTGGCTGGTTTTACCTCAA      |
| <i>mSlpi</i>    | GGGCAAATACAAGTGCTGTG      | CCTGGGAGCAGGGAAGTAGT      |

|                |                       |                           |
|----------------|-----------------------|---------------------------|
| <i>mSod1</i>   | TGCTGGCCTTCAGTTAATCC  | ACCATCCACTTCGAGCAGAA      |
| <i>mSprr2d</i> | CTGGTACTCAAGGCCGAGAC  | CAGGGCACTTTGGTGGAG        |
| <i>mSrxn1</i>  | CGGTGCACAACGTACCAAT   | TTGATCCAGAGGACGTCGAT      |
| <i>mTnfa</i>   | CCACTTGGTGGTTTGCTACGA | GACCCTCACACTCAGATCATCTTCT |
| <i>mTslp</i>   | TCTGGAGATTGCATGAAGGA  | CCAGGCTACCCTGAAACTGA      |
| <i>mTxn1</i>   | GCTTGTCGTGGTGGACTTCT  | CCCCCACCTTTTGACCCTTT      |
| <i>mTxnrd1</i> | GACTACTACTAAGTGCCCTGC | GGAAACCAGCAACAGTTGGG      |
