# Supplementary material for: A Glutathione-Nrf2-Thioredoxin Cross-Talk Ensures Keratinocyte Survival and Efficient Wound Repair
Source: PubMed Central journal article supplement (PMC4726503; doi:10.1371/journal.pgen.1005800), 2016-01-25
Supplement: pgen.1005800.s009.pdf [file pgen.1005800.s009.pdf]

**Table S2: List of antibodies used for western blotting**

| <i>Antigen</i>    | <i>Host</i> | <i>Cat. No.</i> | <i>Source</i>                                                        |
|-------------------|-------------|-----------------|----------------------------------------------------------------------|
| $\beta$ -Actin    | Mouse       | A5441           | Sigma, Buchs, Switzerland                                            |
| $\alpha$ -Tubulin | Mouse       | T5168           | Sigma, Buchs, Switzerland                                            |
| Gclc              | Rabbit      | sc22755         | Santa Cruz, Santa Cruz, CA                                           |
| Filaggrin         | Rabbit      | PRB-417P        | Biolegend, San Diego, CA                                             |
| Gapdh             | Mouse       | 5G4             | HyTest, Turku, Finland                                               |
| Glrx2             | Rabbit      | –               | Dr. Carsten Berndt, Heinrich-Heine University of Düsseldorf, Germany |
| Gpx4              | Rabbit      | ab125066        | Abcam, Cambridge, UK                                                 |
| Loricrin          | Rabbit      | PRB-145P        | Biolegend, San Diego, CA                                             |
| Prdx6             | Rabbit      | ab59543         | Abcam, Cambridge, UK                                                 |
| Txn2              | Goat        | AF3254          | R&D Systems, Minneapolis, MN                                         |
| Txnrd1            | Rat         | –               | Dr. Elisabeth Kremmer, Helmholtz Center Munich, Germany              |
| Txnrd2            | Rat         | –               | Dr. Elisabeth Kremmer, Helmholtz Center Munich, Germany              |
