# Supplementary material for: A Glutathione-Nrf2-Thioredoxin Cross-Talk Ensures Keratinocyte Survival and Efficient Wound Repair
Source: PubMed Central journal article supplement (PMC4726503; doi:10.1371/journal.pgen.1005800), 2016-01-25
Supplement: pgen.1005800.s010.pdf [file pgen.1005800.s010.pdf]

**Table S3: List of antibodies used for immunostaining**

| <i>Antigen</i>                | <i>Host</i> | <i>Cat. No.</i>  | <i>Source</i>                      |
|-------------------------------|-------------|------------------|------------------------------------|
| CD3                           | Rabbit      | A0452            | Dako, Baar, Switzerland            |
| Cleaved caspase-3             | Rabbit      | 9661             | Cell Signaling, Beverly, MA        |
| Filaggrin                     | Rabbit      | PRB-417P         | Biologend, San Diego, CA           |
| pan- $\gamma\delta$ TCR-FITC  | Hamster     | 553177           | BD Pharmingen, Franklin Lakes, NJ  |
| $\gamma$ H2AX-biotin (Ser139) | Mouse       | 16-193           | Merck, Darmstadt, Germany          |
| Keratin 6                     | Rabbit      | PRB-169P         | Biologend, San Diego, CA           |
| Keratin 10                    | Mouse       | M7002            | Dako, Baar Switzerland             |
| Keratin 14                    | Rabbit      | PRB-155P         | BAbCO, Richmond, CA                |
| Ki-67                         | Rabbit      | ab16667          | Abcam, Cambridge, UK               |
| Ki-67                         | Rat         | M724901          | Dako, Baar, Switzerland            |
| Loricrin                      | Rabbit      | PRB-145P         | Biologend, San Diego, CA           |
| p53                           | Rabbit      | NCL-p53-<br>CM5p | Leica Biosystems, Wetzlar, Germany |
